# Supplementary material
Source: publisher site journal article supplement (http://www.degruyter.com/publication/journal_key/SPP/downloadAsset/SPP_SPP_Peer%20Review%20Policy.pdf)
Supplement: Supplementary file [file SPP_SPP_Peer%20Review%20Policy.pdf]

## **Statistics, Politics and Policy – Peer Review Policy**

The journal **Statistics, Politics and Policy** is committed to a diligent double-blind peer review process:

### **Submission:**

All contributions are submitted on the initiative of the respective authors. If the editors of the journal or special issue agree that the contribution is acceptable in scope, length or style for publication in *Statistics, Politics and Policy*, the peer review process will be initiated.

*Statistics, Politics and Policy* regularly announces Call for Papers and encourages interested authors to submit their articles on Special Issues.

Special issues are either managed directly by the journal editors or by external editors and submission conditions will be provided with every call announcement.

### **Review:**

All submitted articles are reviewed in a double-blind peer review process. Author(s) are not aware of the reviewer(s) identity. Reviewer(s) are also not aware of the author(s) identity. All authors are encouraged to submit papers in a properly anonymized form. If author provide articles without proper anonymization, these articles are either returned to the author for proper blinding or properly blinded by the editorial team before the start of the review process.

The peer review of the articles takes approximately four to six weeks.

### **Revision:**

Based on the reviewers' evaluations, the journal or volume editors decide and communicate to the author(s) whether – and under which conditions – the contribution may fulfil the qualifications for being published in *Statistics, Politics and Policy*.

In case that revisions are necessary, all the evaluators' suggestions and queries must be taken into consideration and the author must document his or her reaction to them. The final decision on the publication of a contribution will be taken by the editor(s).
